# Supplementary material for: KCNQ1 p.D446E Variant as a Risk Allele for Arrhythmogenic Phenotypes: Electrophysiological Characterization Reveals a Complex Phenotype Affecting the Slow Delayed Rectifier Potassium Current (IKs) Voltage Dependence by Causing a Hyperpolarizing Shift and a Lack of Response to Protein Kinase A Activation
Source: MDPI journal article supplement (doi:10.3390/ijms25020953), 2024-01-12
Supplement: s1 [file s1]

Supplementary information

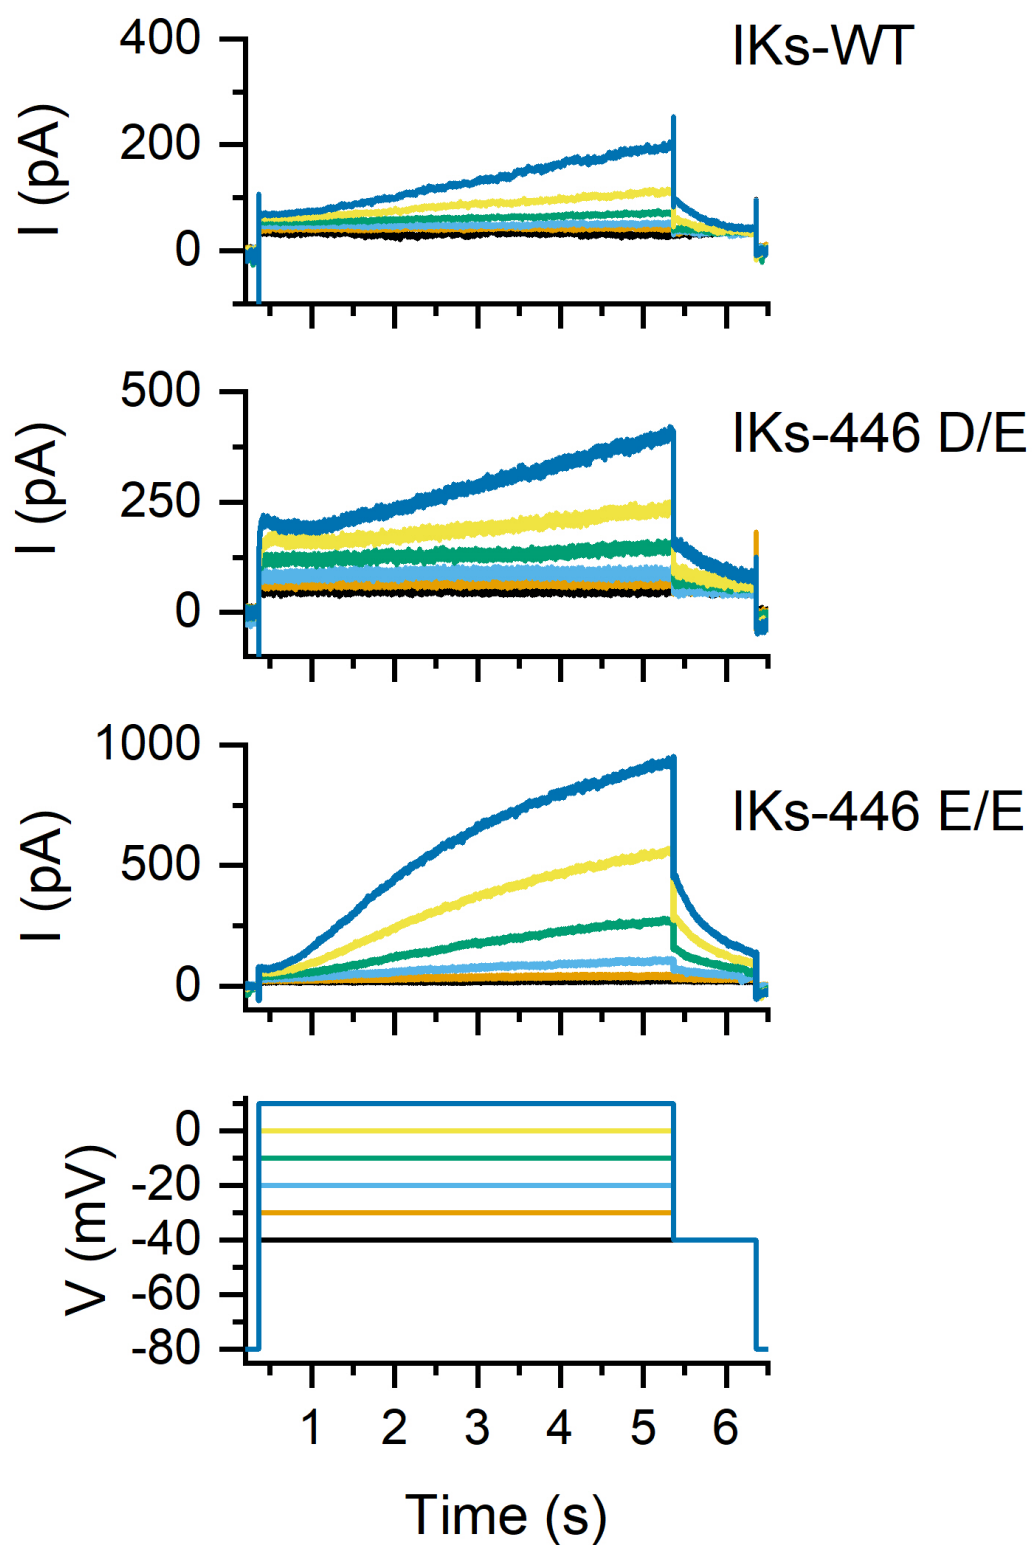

**Figure S1.** Representative traces of experimental series without 8Br-cAMP at more negative potentials.

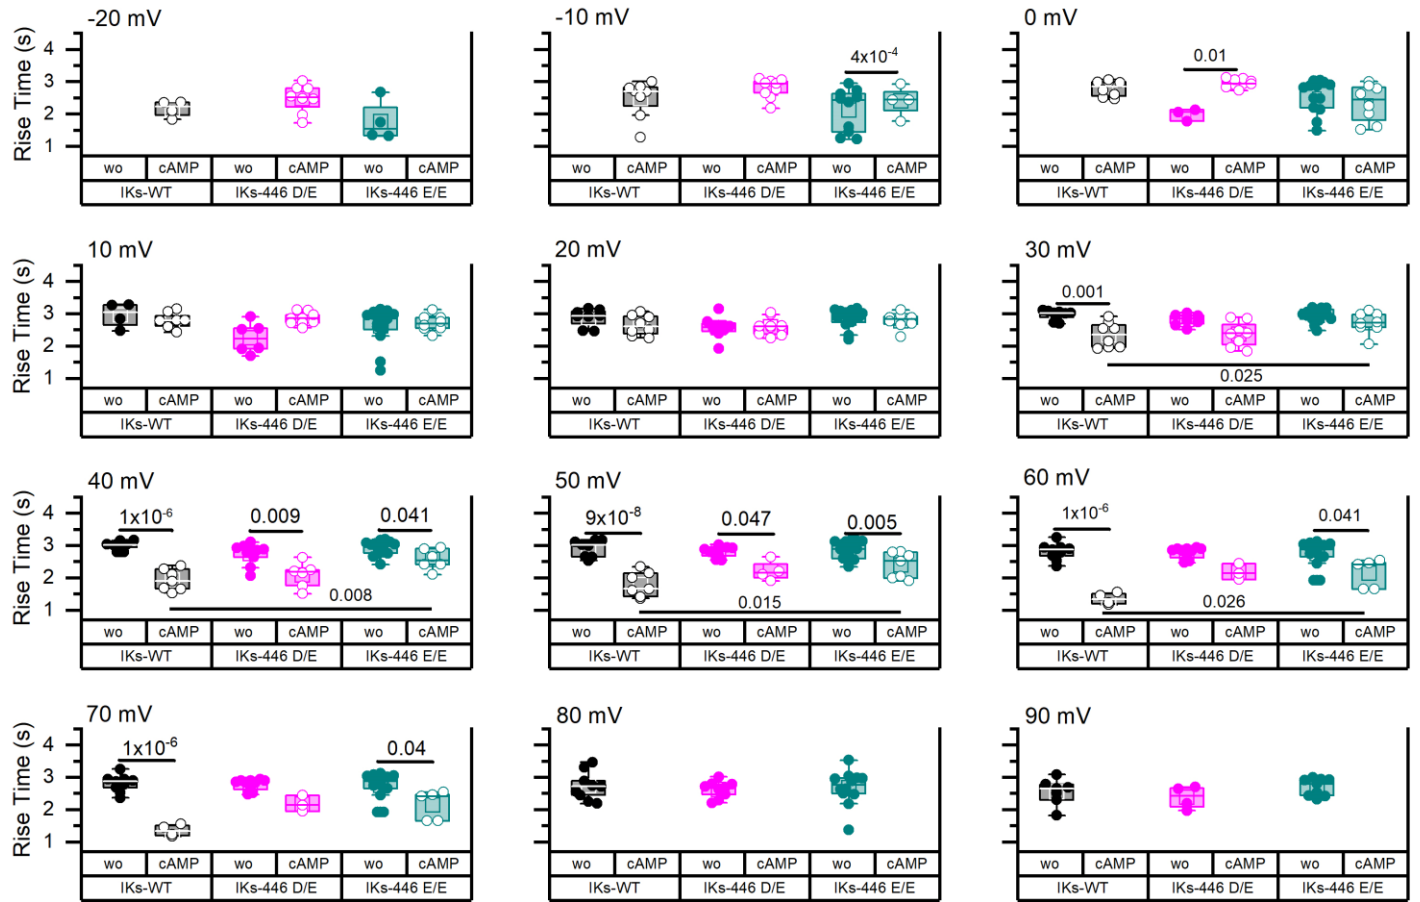

**Figure S2.** Box plots of rise time values at -20 to 90mV. Data are presented as means  $\pm$  SEM. The *p* values of statistically significant differences as assessed by two-way ANOVA and Tukey's comparison test are indicated.

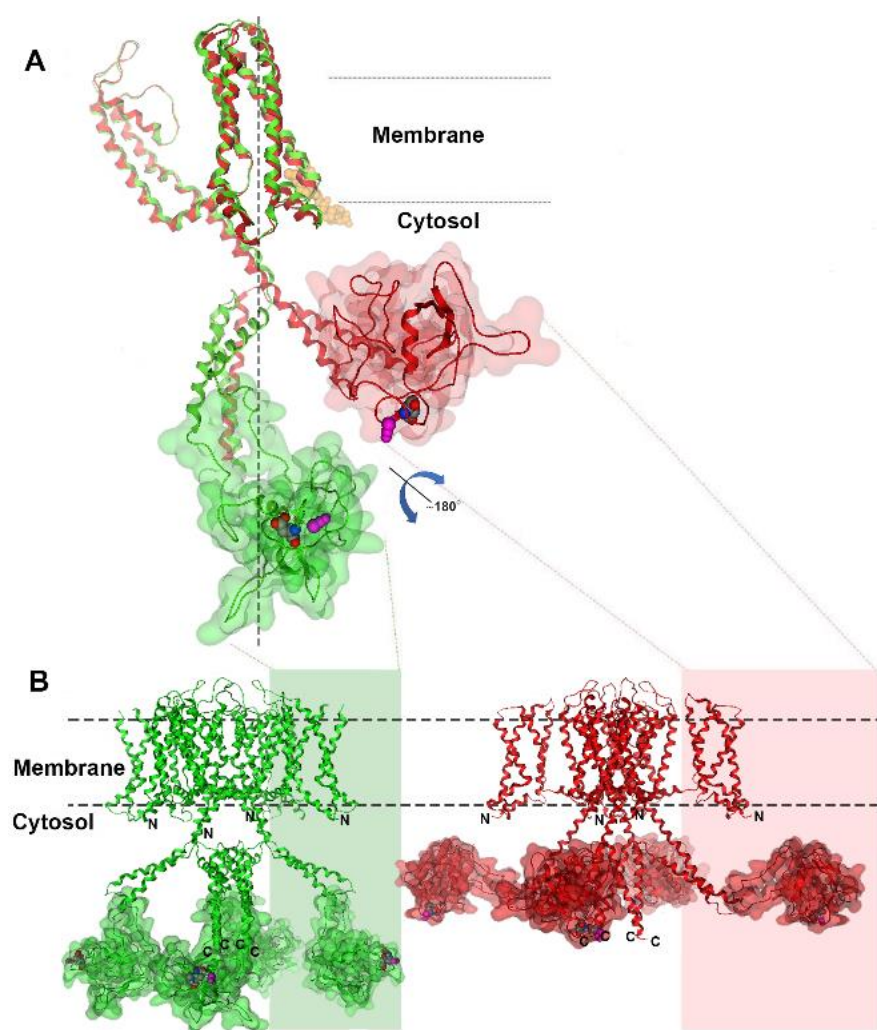

**Figure S3.** Structural model of the Kv7.1 channel. The calmodulin molecule was intentionally excluded from Figure 4 to emphasize the channel chain alterations. As in Figure 4, the attached conformation is depicted in green, while the detached conformation is presented in red. The amino and carboxyl domains are denoted by N and C, respectively. **A**, Superposition of Kv7.1 monomers highlighting the dynamic movement of our modeled domain 5 upon detachment from the VSD domain. Domain 5 is delineated by green or red outlines. **B**, Kv7.1 tetramers in attached (left) and detached (right) conformations, with the same color codes as in panel A except for calmodulin, which is depicted in yellow in both cases. The sizes of the amino- and carboxyl- domains are comparable to that of domain 5. N and C represent the locations of their respective chains within the cytosol.

**Table S1.** *P* values for rise time comparisons among genotypes for a 10 to 70 mV range, using Tukey's comparison test from two-way ANOVA.

## 10 mV

| Genotype     | 8Br-cAMP | Genotype     | 8Br-cAMP | MeanDiff   | SEM       | q Value | Prob    | Alpha | Sig* | LCL         | UCL        |
|--------------|----------|--------------|----------|------------|-----------|---------|---------|-------|------|-------------|------------|
| 446 D/D (WT) | 8Br-cAMP | 446 D/D (WT) | wo       | -180.92628 | 246.18711 | 1.03932 | 0.97644 | 0.05  | 0    | -914.30065  | 552.44808  |
| 446 E/E      | wo       | 446 D/D (WT) | wo       | -335.6572  | 226.23034 | 2.09826 | 0.67615 | 0.05  | 0    | -1009.58173 | 338.26733  |
| 446 E/E      | wo       | 446 D/D (WT) | 8Br-cAMP | -154.73092 | 176.00418 | 1.24328 | 0.94954 | 0.05  | 0    | -679.03518  | 369.57334  |
| 446 E/E      | 8Br-cAMP | 446 D/D (WT) | wo       | -251.0252  | 246.18711 | 1.44201 | 0.90885 | 0.05  | 0    | -984.39957  | 482.34916  |
| 446 E/E      | 8Br-cAMP | 446 D/D (WT) | 8Br-cAMP | -70.09892  | 201.01094 | 0.49318 | 0.99927 | 0.05  | 0    | -668.89658  | 528.69874  |
| 446 E/E      | 8Br-cAMP | 446 E/E      | wo       | 84.632     | 176.00418 | 0.68003 | 0.99661 | 0.05  | 0    | -439.67226  | 608.93626  |
| 446 D/E      | wo       | 446 D/D (WT) | wo       | -709.58702 | 259.504   | 3.86702 | 0.08853 | 0.05  | 0    | -1482.63148 | 63.45744   |
| 446 D/E      | wo       | 446 D/D (WT) | 8Br-cAMP | -528.66074 | 217.11662 | 3.44349 | 0.16673 | 0.05  | 0    | -1175.43614 | 118.11466  |
| 446 D/E      | wo       | 446 E/E      | wo       | -373.92982 | 194.19501 | 2.72312 | 0.40082 | 0.05  | 0    | -952.42332  | 204.56368  |
| 446 D/E      | wo       | 446 E/E      | 8Br-cAMP | -458.56182 | 217.11662 | 2.98689 | 0.30012 | 0.05  | 0    | -1105.33721 | 188.21358  |
| 446 D/E      | 8Br-cAMP | 446 D/D (WT) | wo       | -114.52226 | 241.58508 | 0.6704  | 0.99683 | 0.05  | 0    | -834.18748  | 605.14297  |
| 446 D/E      | 8Br-cAMP | 446 D/D (WT) | 8Br-cAMP | 66.40403   | 195.34752 | 0.48073 | 0.99936 | 0.05  | 0    | -515.5227   | 648.33075  |
| 446 D/E      | 8Br-cAMP | 446 E/E      | wo       | 221.13494  | 169.5073  | 1.84495 | 0.78094 | 0.05  | 0    | -283.81558  | 726.08547  |
| 446 D/E      | 8Br-cAMP | 446 E/E      | 8Br-cAMP | 136.50295  | 195.34752 | 0.98821 | 0.98112 | 0.05  | 0    | -445.42378  | 718.42967  |
| 446 D/E      | 8Br-cAMP | 446 D/E      | wo       | 595.06477  | 211.88413 | 3.97174 | 0.07483 | 0.05  | 0    | -36.12339   | 1226.25292 |

## 20 mV

| Genotype     | 8Br-cAMP | Genotype     | 8Br-cAMP | MeanDiff   | SEM       | q Value | Prob    | Alpha | Sig* | LCL        | UCL       |
|--------------|----------|--------------|----------|------------|-----------|---------|---------|-------|------|------------|-----------|
| 446 D/D (WT) | 8Br-cAMP | 446 D/D (WT) | wo       | -235.32325 | 170.31769 | 1.95398 | 0.73759 | 0.05  | 0    | -739.59851 | 268.95201 |
| 446 E/E      | wo       | 446 D/D (WT) | wo       | -14.62301  | 149.12933 | 0.13867 | 1       | 0.05  | 0    | -456.16392 | 426.9179  |
| 446 E/E      | wo       | 446 D/D (WT) | 8Br-cAMP | 220.70024  | 149.12933 | 2.09293 | 0.6783  | 0.05  | 0    | -220.84067 | 662.24115 |
| 446 E/E      | 8Br-cAMP | 446 D/D (WT) | wo       | -97.65732  | 170.31769 | 0.81089 | 0.99235 | 0.05  | 0    | -601.93258 | 406.61793 |
| 446 E/E      | 8Br-cAMP | 446 D/D (WT) | 8Br-cAMP | 137.66592  | 170.31769 | 1.14309 | 0.96471 | 0.05  | 0    | -366.60933 | 641.94118 |
| 446 E/E      | 8Br-cAMP | 446 E/E      | wo       | -83.03432  | 149.12933 | 0.78743 | 0.99332 | 0.05  | 0    | -524.57523 | 358.50659 |
| 446 D/E      | wo       | 446 D/D (WT) | wo       | -469.50117 | 165.51905 | 4.01147 | 0.06761 | 0.05  | 0    | -959.56863 | 20.56629  |
| 446 D/E      | wo       | 446 D/D (WT) | 8Br-cAMP | -234.17792 | 165.51905 | 2.00084 | 0.718   | 0.05  | 0    | -724.24538 | 255.88954 |
| 446 D/E      | wo       | 446 E/E      | wo       | -454.87816 | 143.62449 | 4.47901 | 0.02952 | 0.05  | 1    | -880.12039 | -29.63592 |
| 446 D/E      | wo       | 446 E/E      | 8Br-cAMP | -371.84384 | 165.51905 | 3.17708 | 0.23516 | 0.05  | 0    | -861.9113  | 118.22362 |
| 446 D/E      | 8Br-cAMP | 446 D/D (WT) | wo       | -281.71554 | 165.51905 | 2.40701 | 0.53685 | 0.05  | 0    | -771.783   | 208.35192 |
| 446 D/E      | 8Br-cAMP | 446 D/D (WT) | 8Br-cAMP | -46.39229  | 165.51905 | 0.39638 | 0.99975 | 0.05  | 0    | -536.45975 | 443.67517 |
| 446 D/E      | 8Br-cAMP | 446 E/E      | wo       | -267.09253 | 143.62449 | 2.62995 | 0.43816 | 0.05  | 0    | -692.33476 | 158.1497  |
| 446 D/E      | 8Br-cAMP | 446 E/E      | 8Br-cAMP | -184.05821 | 165.51905 | 1.57261 | 0.87418 | 0.05  | 0    | -674.12567 | 306.00925 |
| 446 D/E      | 8Br-cAMP | 446 D/E      | wo       | 187.78563  | 160.57706 | 1.65384 | 0.84911 | 0.05  | 0    | -287.64964 | 663.2209  |

## 30 mV

| Genotype     | 8Br-cAMP | Genotype     | 8Br-cAMP | MeanDiff   | SEM       | q Value | Prob       | Alpha | Sig* | LCL         | UCL        |
|--------------|----------|--------------|----------|------------|-----------|---------|------------|-------|------|-------------|------------|
| 446 D/D (WT) | 8Br-cAMP | 446 D/D (WT) | wo       | -611.28074 | 135.17107 | 6.39546 | 5.16769E-4 | 0.05  | 1    | -1011.80142 | -210.76005 |
| 446 E/E      | wo       | 446 D/D (WT) | wo       | -10.68861  | 117.29089 | 0.12888 | 1          | 0.05  | 0    | -358.22915  | 336.85193  |
| 446 E/E      | wo       | 446 D/D (WT) | 8Br-cAMP | 600.59213  | 121.78641 | 6.97422 | 1.31896E-4 | 0.05  | 1    | 239.73106   | 961.45319  |
| 446 E/E      | 8Br-cAMP | 446 D/D (WT) | wo       | -147.30945 | 140.18943 | 1.48604 | 0.89809    | 0.05  | 0    | -562.69984  | 268.08095  |
| 446 E/E      | 8Br-cAMP | 446 D/D (WT) | 8Br-cAMP | 463.97129  | 143.97171 | 4.55752 | 0.02569    | 0.05  | 1    | 37.37375    | 890.56883  |
| 446 E/E      | 8Br-cAMP | 446 E/E      | wo       | -136.62084 | 127.33337 | 1.51736 | 0.88976    | 0.05  | 0    | -513.9179   | 240.67623  |
| 446 D/E      | wo       | 446 D/D (WT) | wo       | -228.31056 | 131.1352  | 2.46219 | 0.51212    | 0.05  | 0    | -616.8727   | 160.25157  |
| 446 D/E      | wo       | 446 D/D (WT) | 8Br-cAMP | 382.97017  | 135.17107 | 4.00679 | 0.06846    | 0.05  | 0    | -17.55051   | 783.49086  |
| 446 D/E      | wo       | 446 E/E      | wo       | -217.62195 | 117.29089 | 2.62394 | 0.44095    | 0.05  | 0    | -565.16249  | 129.91859  |
| 446 D/E      | wo       | 446 E/E      | 8Br-cAMP | -81.00112  | 140.18943 | 0.81713 | 0.99206    | 0.05  | 0    | -496.39151  | 334.38928  |
| 446 D/E      | 8Br-cAMP | 446 D/D (WT) | wo       | -590.27542 | 135.17107 | 6.1757  | 8.56646E-4 | 0.05  | 1    | -990.7961   | -189.75474 |
| 446 D/E      | 8Br-cAMP | 446 D/D (WT) | 8Br-cAMP | 21.00532   | 139.08989 | 0.21357 | 0.99999    | 0.05  | 0    | -391.12707  | 433.1377   |
| 446 D/E      | 8Br-cAMP | 446 E/E      | wo       | -579.58681 | 121.78641 | 6.7303  | 2.3583E-4  | 0.05  | 1    | -940.44788  | -218.72574 |
| 446 D/E      | 8Br-cAMP | 446 E/E      | 8Br-cAMP | -442.96597 | 143.97171 | 4.35119 | 0.03757    | 0.05  | 1    | -869.56352  | -16.36843  |
| 446 D/E      | 8Br-cAMP | 446 D/E      | wo       | -361.96486 | 135.17107 | 3.78702 | 0.09792    | 0.05  | 0    | -762.48554  | 38.55583   |

## 40 mV

| Genotype     | 8Br-cAMP | Genotype     | 8Br-cAMP | MeanDiff    | SEM       | q Value  | Prob       | Alpha | Sig* | LCL         | UCL        |
|--------------|----------|--------------|----------|-------------|-----------|----------|------------|-------|------|-------------|------------|
| 446 D/D (WT) | 8Br-cAMP | 446 D/D (WT) | wo       | -1162.66956 | 154.96673 | 10.61043 | 8.87924E-8 | 0.05  | 1    | -1622.99507 | -702.34406 |
| 446 E/E      | wo       | 446 D/D (WT) | wo       | -167.59759  | 130.1981  | 1.82045  | 0.79038    | 0.05  | 0    | -554.34838  | 219.15319  |
| 446 E/E      | wo       | 446 D/D (WT) | 8Br-cAMP | 995.07197   | 145.5659  | 9.6674   | 2.86888E-7 | 0.05  | 1    | 562.67145   | 1427.47249 |
| 446 E/E      | 8Br-cAMP | 446 D/D (WT) | wo       | -524.01664  | 162.38556 | 4.56365  | 0.02605    | 0.05  | 1    | -1006.37962 | -41.65367  |
| 446 E/E      | 8Br-cAMP | 446 D/D (WT) | 8Br-cAMP | 638.65292   | 174.94844 | 5.16262  | 0.00811    | 0.05  | 1    | 118.97217   | 1158.33367 |
| 446 E/E      | 8Br-cAMP | 446 E/E      | wo       | -356.41905  | 153.43993 | 3.28502  | 0.20554    | 0.05  | 0    | -812.20922  | 99.37112   |
| 446 D/E      | wo       | 446 D/D (WT) | wo       | -349.11278  | 140.63002 | 3.51077  | 0.1502     | 0.05  | 0    | -766.85137  | 68.62581   |
| 446 D/E      | wo       | 446 D/D (WT) | 8Br-cAMP | 813.55678   | 154.96673 | 7.42445  | 5.0885E-5  | 0.05  | 1    | 353.23128   | 1273.88229 |
| 446 D/E      | wo       | 446 E/E      | wo       | -181.51519  | 130.1981  | 1.97162  | 0.73024    | 0.05  | 0    | -568.26597  | 205.23559  |
| 446 D/E      | wo       | 446 E/E      | 8Br-cAMP | 174.90386   | 162.38556 | 1.52324  | 0.888      | 0.05  | 0    | -307.45911  | 657.26684  |
| 446 D/E      | 8Br-cAMP | 446 D/D (WT) | wo       | -1010.96735 | 162.38556 | 8.8045   | 1.84059E-6 | 0.05  | 1    | -1493.33032 | -528.60438 |
| 446 D/E      | 8Br-cAMP | 446 D/D (WT) | 8Br-cAMP | 151.70221   | 174.94844 | 1.2263   | 0.95245    | 0.05  | 0    | -367.97854  | 671.38296  |
| 446 D/E      | 8Br-cAMP | 446 E/E      | wo       | -843.36976  | 153.43993 | 7.77311  | 2.20856E-5 | 0.05  | 1    | -1299.15993 | -387.57959 |

|         |          |         |          |            |           |         |         |      |   |             |            |
|---------|----------|---------|----------|------------|-----------|---------|---------|------|---|-------------|------------|
| 446 D/E | 8Br-cAMP | 446 E/E | 8Br-cAMP | -486.95071 | 181.55257 | 3.79313 | 0.09812 | 0.05 | 0 | -1026.24891 | 52.3475    |
| 446 D/E | 8Br-cAMP | 446 D/E | wo       | -661.85457 | 162.38556 | 5.76408 | 0.00229 | 0.05 | 1 | -1144.21754 | -179.49159 |

## 50 mV

| Genotype     | 8Br-cAMP | Genotype     | 8Br-cAMP | MeanDiff    | SEM       | q Value  | Prob       | Alpha | Sig* | LCL         | UCL        |
|--------------|----------|--------------|----------|-------------|-----------|----------|------------|-------|------|-------------|------------|
| 446 D/D (WT) | 8Br-cAMP | 446 D/D (WT) | wo       | -1241.83854 | 161.39669 | 10.88142 | 7.69426E-8 | 0.05  | 1    | -1721.2641  | -762.41298 |
| 446 E/E      | wo       | 446 D/D (WT) | wo       | -171.80509  | 133.70374 | 1.81722  | 0.7916     | 0.05  | 0    | -568.96931  | 225.35913  |
| 446 E/E      | wo       | 446 D/D (WT) | 8Br-cAMP | 1070.03345  | 149.91182 | 10.09431 | 1.45558E-7 | 0.05  | 1    | 624.72346   | 1515.34343 |
| 446 E/E      | 8Br-cAMP | 446 D/D (WT) | wo       | -641.87332  | 161.39669 | 5.62432  | 0.0031     | 0.05  | 1    | -1121.29888 | -162.44777 |
| 446 E/E      | 8Br-cAMP | 446 D/D (WT) | 8Br-cAMP | 599.96522   | 175.05929 | 4.84681  | 0.0152     | 0.05  | 1    | 79.95519    | 1119.97524 |
| 446 E/E      | 8Br-cAMP | 446 E/E      | wo       | -470.06823  | 149.91182 | 4.43445  | 0.03303    | 0.05  | 1    | -915.37822  | -24.75825  |
| 446 D/E      | wo       | 446 D/D (WT) | wo       | -217.68347  | 146.46511 | 2.10187  | 0.67448    | 0.05  | 0    | -652.75507  | 217.38814  |
| 446 D/E      | wo       | 446 D/D (WT) | 8Br-cAMP | 1024.15507  | 161.39669 | 8.974    | 1.25274E-6 | 0.05  | 1    | 544.72951   | 1503.58063 |
| 446 D/E      | wo       | 446 E/E      | wo       | -45.87838   | 133.70374 | 0.48527  | 0.99933    | 0.05  | 0    | -443.0426   | 351.28584  |
| 446 D/E      | wo       | 446 E/E      | 8Br-cAMP | 424.18986   | 161.39669 | 3.7169   | 0.11046    | 0.05  | 0    | -55.2357    | 903.61541  |
| 446 D/E      | 8Br-cAMP | 446 D/D (WT) | wo       | -819.52795  | 193.75513 | 5.98171  | 0.00142    | 0.05  | 1    | -1395.07358 | -243.98231 |
| 446 D/E      | 8Br-cAMP | 446 D/D (WT) | 8Br-cAMP | 422.31059   | 205.27521 | 2.90945  | 0.32695    | 0.05  | 0    | -187.45522  | 1032.0764  |
| 446 D/E      | 8Br-cAMP | 446 E/E      | wo       | -647.72286  | 184.29789 | 4.97031  | 0.01193    | 0.05  | 1    | -1195.17595 | -100.26976 |
| 446 D/E      | 8Br-cAMP | 446 E/E      | 8Br-cAMP | -177.65462  | 205.27521 | 1.22393  | 0.95283    | 0.05  | 0    | -787.42043  | 432.11119  |
| 446 D/E      | 8Br-cAMP | 446 D/E      | wo       | -601.84448  | 193.75513 | 4.39285  | 0.03561    | 0.05  | 1    | -1177.39011 | -26.29884  |

## 60 mV

| Genotype     | 8Br-cAMP | Genotype     | 8Br-cAMP | MeanDiff    | SEM       | q Value  | Prob       | Alpha | Sig* | LCL         | UCL        |
|--------------|----------|--------------|----------|-------------|-----------|----------|------------|-------|------|-------------|------------|
| 446 D/D (WT) | 8Br-cAMP | 446 D/D (WT) | wo       | -1573.68844 | 214.2423  | 10.38792 | 1.25334E-7 | 0.05  | 1    | -2215.55693 | -931.81996 |
| 446 E/E      | wo       | 446 D/D (WT) | wo       | -178.32479  | 149.93838 | 1.68195  | 0.83922    | 0.05  | 0    | -627.53916  | 270.88957  |
| 446 E/E      | wo       | 446 D/D (WT) | 8Br-cAMP | 1395.36365  | 205.31158 | 9.61145  | 6.16391E-7 | 0.05  | 1    | 780.25155   | 2010.47575 |
| 446 E/E      | 8Br-cAMP | 446 D/D (WT) | wo       | -783.79138  | 198.34983 | 5.58835  | 0.004      | 0.05  | 1    | -1378.04612 | -189.53663 |
| 446 E/E      | 8Br-cAMP | 446 D/D (WT) | 8Br-cAMP | 789.89707   | 242.92793 | 4.59841  | 0.02664    | 0.05  | 1    | 62.08661    | 1517.70752 |
| 446 E/E      | 8Br-cAMP | 446 E/E      | wo       | -605.46658  | 188.66832 | 4.53844  | 0.02966    | 0.05  | 1    | -1170.7156  | -40.21757  |
| 446 D/E      | wo       | 446 D/D (WT) | wo       | -116.29995  | 166.38982 | 0.98848  | 0.98097    | 0.05  | 0    | -614.80272  | 382.20282  |
| 446 D/E      | wo       | 446 D/D (WT) | 8Br-cAMP | 1457.3885   | 217.6164  | 9.47106  | 8.34919E-7 | 0.05  | 1    | 805.41122   | 2109.36577 |
| 446 D/E      | wo       | 446 E/E      | wo       | 62.02484    | 154.72121 | 0.56693  | 0.99856    | 0.05  | 0    | -401.51885  | 525.56854  |
| 446 D/E      | wo       | 446 E/E      | 8Br-cAMP | 667.49143   | 201.98958 | 4.67339  | 0.02327    | 0.05  | 1    | 62.33201    | 1272.65084 |
| 446 D/E      | 8Br-cAMP | 446 D/D (WT) | wo       | -752.85868  | 238.38682 | 4.46628  | 0.03369    | 0.05  | 1    | -1467.064   | -38.65336  |
| 446 D/E      | 8Br-cAMP | 446 D/D (WT) | 8Br-cAMP | 820.82976   | 276.58562 | 4.197    | 0.05347    | 0.05  | 0    | -7.81889    | 1649.47841 |
| 446 D/E      | 8Br-cAMP | 446 E/E      | wo       | -574.53389  | 230.39392 | 3.52663  | 0.15092    | 0.05  | 0    | -1264.79253 | 115.72474  |
| 446 D/E      | 8Br-cAMP | 446 E/E      | 8Br-cAMP | 30.93269    | 264.46644 | 0.16541  | 1          | 0.05  | 0    | -761.40697  | 823.27235  |
| 446 D/E      | 8Br-cAMP | 446 D/E      | wo       | -636.55874  | 241.42372 | 3.72884  | 0.11243    | 0.05  | 0    | -1359.86258 | 86.74511   |

## 70 mV

| Genotype     | 8Br-cAMP | Genotype     | 8Br-cAMP | MeanDiff    | SEM       | q Value | Prob       | Alpha | Sig* | LCL         | UCL         |
|--------------|----------|--------------|----------|-------------|-----------|---------|------------|-------|------|-------------|-------------|
| 446 D/D (WT) | 8Br-cAMP | 446 D/D (WT) | wo       | -2913.89038 | 423.71024 | 9.72566 | 1.73683E-6 | 0.05  | 1    | -4202.64603 | -1625.13472 |
| 446 E/E      | wo       | 446 D/D (WT) | wo       | -356.23303  | 174.30451 | 2.89028 | 0.34279    | 0.05  | 0    | -886.39705  | 173.93099   |
| 446 E/E      | wo       | 446 D/D (WT) | 8Br-cAMP | 2557.65735  | 417.14069 | 8.67111 | 1.34167E-5 | 0.05  | 1    | 1288.88361  | 3826.43108  |
| 446 E/E      | 8Br-cAMP | 446 D/D (WT) | wo       | -770.26083  | 267.97789 | 4.06494 | 0.0725     | 0.05  | 0    | -1585.34148 | 44.81981    |
| 446 E/E      | 8Br-cAMP | 446 D/D (WT) | 8Br-cAMP | 2143.62954  | 464.15131 | 6.53138 | 8.86938E-4 | 0.05  | 1    | 731.86846   | 3555.39063  |
| 446 E/E      | 8Br-cAMP | 446 E/E      | wo       | -414.0278   | 257.46482 | 2.27419 | 0.5998     | 0.05  | 0    | -1197.13195 | 369.07635   |
| 446 D/E      | wo       | 446 D/D (WT) | wo       | -298.06819  | 189.48898 | 2.22457 | 0.62172    | 0.05  | 0    | -874.41724  | 278.28086   |
| 446 D/E      | wo       | 446 D/D (WT) | 8Br-cAMP | 2615.82219  | 423.71024 | 8.7308  | 1.19388E-5 | 0.05  | 1    | 1327.06653  | 3904.57784  |
| 446 D/E      | wo       | 446 E/E      | wo       | 58.16484    | 174.30451 | 0.47192 | 0.99939    | 0.05  | 0    | -471.99918  | 588.32886   |
| 446 D/E      | wo       | 446 E/E      | 8Br-cAMP | 472.19264   | 267.97789 | 2.49193 | 0.50397    | 0.05  | 0    | -342.888    | 1287.27328  |
| 446 D/E      | 8Br-cAMP | 446 D/D (WT) | wo       | -2913.89038 | 423.71024 | 9.72566 | 1.73683E-6 | 0.05  | 1    | -4202.64603 | -1625.13472 |
| 446 D/E      | 8Br-cAMP | 446 D/D (WT) | 8Br-cAMP | 0           | 568.46694 | 0       | 1          | 0.05  | 0    | -1729.04715 | 1729.04715  |
| 446 D/E      | 8Br-cAMP | 446 E/E      | wo       | -2557.65735 | 417.14069 | 8.67111 | 1.34167E-5 | 0.05  | 1    | -3826.43108 | -1288.88361 |
| 446 D/E      | 8Br-cAMP | 446 E/E      | 8Br-cAMP | -2143.62954 | 464.15131 | 6.53138 | 8.86938E-4 | 0.05  | 1    | -3555.39063 | -731.86846  |
| 446 D/E      | 8Br-cAMP | 446 D/E      | wo       | -2615.82219 | 423.71024 | 8.7308  | 1.19388E-5 | 0.05  | 1    | -3904.57784 | -1327.06653 |

\*1 indicates that the difference of the means is significant (P<0.05); 0 indicates that the difference of the means is not significant (P>0.05). wo: without 8Br-cAMP; LCL: Lower confidence level; UCL: Upper confidence level.

**Table S2.** *P* values for  $V_{1/2}$  comparisons among genotypes using Tukey's comparison test from two-way ANOVA with and without 8Br-cAMP.

| Genotype     | cAMP | Genotype     | cAMP |  | MeanDiff | SEM     | q Value  | Prob     | Alpha | Sig* | LCL      | UCL      |
|--------------|------|--------------|------|--|----------|---------|----------|----------|-------|------|----------|----------|
| 446 D/D (WT) | cAMP | 446 D/D (WT) | wo   |  | -36.1713 | 3.69877 | 13.82998 | 3.56E-08 | 0.05  | 1    | -47.0227 | -25.3198 |
| 446 E/E      | wo   | 446 D/D (WT) | wo   |  | -14.728  | 3.12001 | 6.67578  | 1.75E-04 | 0.05  | 1    | -23.8815 | -5.57446 |
| 446 E/E      | wo   | 446 D/D (WT) | cAMP |  | 21.44327 | 4.07123 | 7.4487   | 2.29E-05 | 0.05  | 1    | 9.49906  | 33.38748 |
| 446 E/E      | cAMP | 446 D/D (WT) | wo   |  | -22.1816 | 3.89188 | 8.06026  | 4.33E-06 | 0.05  | 1    | -33.5996 | -10.7636 |
| 446 E/E      | cAMP | 446 D/D (WT) | cAMP |  | 13.98964 | 4.68904 | 4.21927  | 0.044    | 0.05  | 1    | 0.23288  | 27.7464  |
| 446 E/E      | cAMP | 446 E/E      | wo   |  | -7.45363 | 4.24744 | 2.48174  | 0.50138  | 0.05  | 0    | -19.9148 | 5.00755  |
| 446 D/E      | wo   | 446 D/D (WT) | wo   |  | -1.32458 | 3.20323 | 0.5848   | 0.99838  | 0.05  | 0    | -10.7222 | 8.07307  |
| 446 D/E      | wo   | 446 D/D (WT) | cAMP |  | 34.84667 | 4.13535 | 11.91692 | 2.13E-08 | 0.05  | 1    | 22.71434 | 46.97899 |
| 446 D/E      | wo   | 446 E/E      | wo   |  | 13.4034  | 3.62694 | 5.22624  | 0.0057   | 0.05  | 1    | 2.76265  | 24.04415 |
| 446 D/E      | wo   | 446 E/E      | cAMP |  | 20.85702 | 4.30893 | 6.84538  | 1.13E-04 | 0.05  | 1    | 8.21543  | 33.49862 |
| 446 D/E      | cAMP | 446 D/D (WT) | wo   |  | -35.0154 | 3.5413  | 13.98336 | 3.51E-08 | 0.05  | 1    | -45.4049 | -24.6259 |
| 446 D/E      | cAMP | 446 D/D (WT) | cAMP |  | 1.15583  | 4.40241 | 0.3713   | 0.99982  | 0.05  | 0    | -11.76   | 14.07168 |
| 446 D/E      | cAMP | 446 E/E      | wo   |  | -20.2874 | 3.92872 | 7.30283  | 3.39E-05 | 0.05  | 1    | -31.8136 | -8.76132 |
| 446 D/E      | cAMP | 446 E/E      | cAMP |  | -12.8338 | 4.56586 | 3.9751   | 0.06799  | 0.05  | 0    | -26.2292 | 0.56155  |
| 446 D/E      | cAMP | 446 D/E      | wo   |  | -33.6908 | 3.99513 | 11.92604 | 2.12E-08 | 0.05  | 1    | -45.4118 | -21.9699 |

\*1 indicates that the difference of the means is significant ( $P < 0.05$ ); 0 indicates that the difference of the means is not significant ( $P > 0.05$ ). wo: without 8Br-cAMP; LCL: Lower confidence level; UCL: Upper confidence level.

**Table S3.** Clinical and ECG characteristics of both index cases and available family members.

| Individual    | Age | <i>KCNQ1</i><br>Genotype | SCD | Prolonged<br>QT interval | Early<br>Repolarization V1-<br>V4 | Sinus<br>Bradycardi<br>a | Other<br>studies |
|---------------|-----|--------------------------|-----|--------------------------|-----------------------------------|--------------------------|------------------|
| Index<br>case | 18  | p.D446E /WT              | Yes | Yes                      | Yes                               | -                        | EP:<br>QTc 520ms |
| II-2          | 42  | p.D446E /WT              | No  | No                       | Yes                               | Yes                      | -                |
| I-2           | 71  | p.D446E /WT              | No  | Yes                      | No                                | Yes                      | -                |
| II-6          | 32  | p.D446E /WT              | No  | No                       | No                                | No                       | -                |
| III-1         | 26  | p.D446E /WT              | No  | No                       | No                                | No                       | -                |
| II-4          | 40  | WT/WT                    | No  | No                       | No                                | No                       | -                |
| III-3         | 11  | WT/WT                    | No  | No                       | No                                | No                       | -                |
| III-4         | 4   | WT/WT                    | No  | No                       | Yes                               | Yes                      | -                |
| III-5         | 8   | WT/WT                    | No  | No                       | Yes                               | No                       | -                |
| IV-1          | 5   | WT/WT                    | No  | No                       | Yes                               | No                       | -                |
| IV-2          | 3   | WT/WT                    | No  | No                       | Yes                               | No                       | -                |

## Family 2

|               |    |             |    |    |     |    |                      |
|---------------|----|-------------|----|----|-----|----|----------------------|
| Index<br>case | 8  | p.D446E /WT | No | No | No  | No | Viskin:<br>QTc 478ms |
| I-1           | 37 | p.D446E /WT | No | No | Yes | No | No                   |
